# Supplementary material for: Unravelling the selective transport of Co2+ and Hg2+ ions through functionalized graphene nanostructures from aqueous nitrate solution: a molecular dynamics simulation study
Source: Royal Society of Chemistry journal article supplement (doi:10.1039/d6ra00091f), 2026-05-08
Supplement: d6ra00091f1.pdf [file d6ra00091f1.pdf]

## Supplementary information (SI)

### Unravelling the Selective Transport of $\text{Co}^{2+}$ and $\text{Hg}^{2+}$ Ions through Functionalized Graphene Nanostructures from Aqueous Nitrate Solution: A Molecular Dynamics Simulation Study

Drisya G. Chandran<sup>a</sup>, Rima Biswas<sup>\*a</sup>

<sup>a</sup>Process Simulation Research Group, School of Chemical Engineering, Vellore Institute of Technology, Vellore, Tamil Nadu, India 632014

\*Corresponding author E-mail: [rима.biswas@vit.ac.in](mailto:rима.biswas@vit.ac.in)

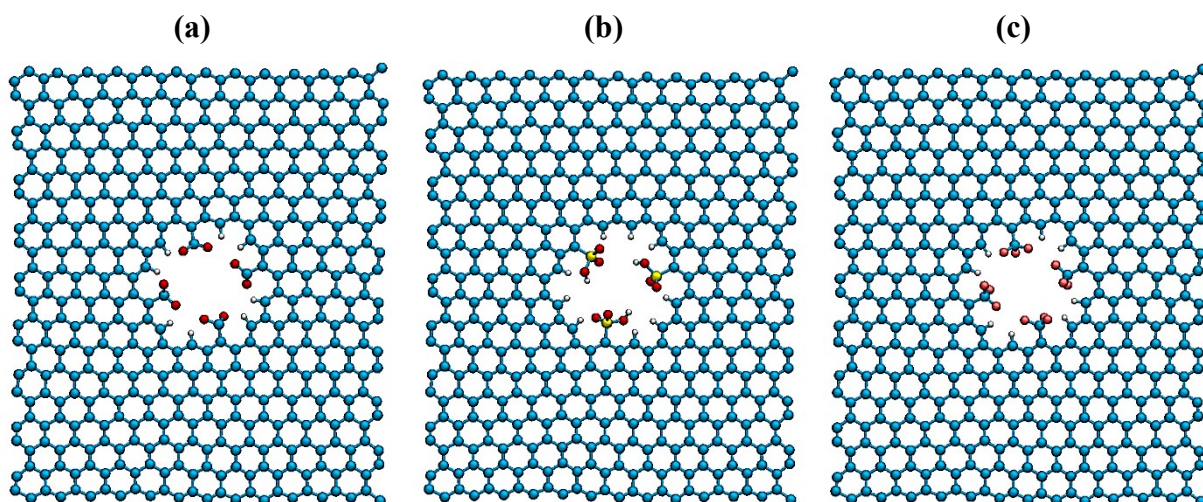

**Fig. S1** Snapshots of nanoporous GRA membrane functionalized with (a)  $-\text{COO}^-$ , (b)  $-\text{SO}_3\text{H}$ , and (c)  $-\text{CF}_3$ . Carbon, oxygen, hydrogen, sulphur, and fluorine are represented by cyan, red, white, yellow, and pink colors respectively.

**Table S1** List of non-bonding parameters

| Molecules/Ions             | Site   | Charge (e) | $\sigma(\text{\AA})$ | $\epsilon(\text{kcal/mol})$ |
|----------------------------|--------|------------|----------------------|-----------------------------|
| $\text{COO}^-$ -GRA        | C(GRA) | 0.1000     | 3.4000               | 0.0860                      |
|                            | C      | 0.7000     | 3.7500               | 0.1090                      |
|                            | O(C-O) | -1.0000    | 2.9600               | 0.2100                      |
|                            | O(C=O) | -0.8000    | 2.9600               | 0.2100                      |
| $\text{SO}_3\text{H}$ -GRA | C(GRA) | -0.0134    | 3.5418               | -0.0700                     |
|                            | S      | 1.4177     | 3.5418               | -0.2500                     |
|                            | O(S=O) | -0.5636    | 2.9531               | -0.1700                     |
|                            | O(S-O) | -0.7151    | 3.1127               | -0.1700                     |
|                            | H      | 0.5316     | 0.0000               | -0.0000                     |
| $\text{CF}_3$ -GRA         | C(GRA) | -0.2042    | 3.5418               | -0.0700                     |
|                            | C      | 0.4966     | 3.4919               | -0.0660                     |
|                            | F      | -0.1685    | 2.8933               | -0.0600                     |
